# Supplementary material
Source: PubMed Central journal article supplement (PMC4168359)
Supplement: gf447sup_10-1055-s-0031-1298323.pdf [file gf447sup_10-1055-s-0031-1298323.pdf]

# Der „PIP-Skandal“ – Komplikationen minderwertiger Brustimplantate: aktueller Wissensstand, behördliche Empfehlungen und Fallbericht

## The “PIP scandal” – Complications in Breast Implants of Inferior Quality: State of Knowledge, Official Recommendations and Case Report

### Autoren

F. M. Lampert<sup>1</sup>, M. Schwarz<sup>2</sup>, S. Grabin<sup>1</sup>, G. B. Stark<sup>1</sup>

### Institute

<sup>1</sup> Abteilung Plastische und Handchirurgie, Universitätsklinikum Freiburg, Freiburg i. Br.

<sup>2</sup> Zentrum für ambulante Diagnostik und Chirurgie, Freiburg i. Br.

### Schlüsselwörter

- benigne Mammatumoren
- BRCA
- Fehlbildungen der Mamma
- Mamma
- Mammakarzinom

### Key words

- benign mammary gland tumor
- BRCA (breast cancer antigen)
- breast
- mammary gland tumor
- mammary malformation

### Zusammenfassung

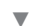

Aufgrund unzulässig hoher Rupturraten von Brustimplantaten des französischen Herstellers Poly Implant Prothèse (PIP) nahm die französische Aufsichtsbehörde für Medizinprodukte (Afssaps) diese Produkte im März 2010 aus dem Handel. Laboruntersuchungen bestätigten die Verwendung von minderwertigem Silikonmaterial für Hülle und Füllung der Implantate, eine akute Toxizität oder Mutagenität konnte bisher nicht nachgewiesen werden, jedoch sind mittlerweile (12/2011) bei insgesamt 20 Trägerinnen von PIP-Implantaten Krebserkrankungen aufgetreten. Anhand eines klinischen Falles sollen hier die aktuellen Empfehlungen der Afssaps sowie des Bundesinstituts für Arzneimittel und Medizinprodukte (BfArM) zusammengefasst werden. Ebenfalls soll darauf hingewiesen werden, dass identische Produkte vom niederländischen Hersteller Rofil sowie der Firma GfE Medizintechnik unter anderer Bezeichnung in den Handel gebracht wurden. Ergänzend sollen die sich aus dem „PIP-Skandal“ ergebenden medizinischen und medizinrechtlichen Konsequenzen erörtert werden.

### Abstract

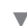

Following the clinical observation of high rate of ruptures of breast implants of the French manufacturer Poly Implant Prothèse (PIP), the French Health Products Safety Agency (Afssaps) removed these products from the market in March 2010. Physical and toxicological tests confirmed the use of silicone of improper quality both for the shell and the gel filling. Until now (12/2011), no acute toxicity or mutagenicity could be observed, but 20 cases of malignancies occurred in carriers of PIP-protheses. By means of a clinical example, we summarize the official recommendations of the Afssaps and its German equivalent, the Bundesinstitut für Arzneimittel und Medizinprodukte (BfArM) for diagnosis and treatment in women with PIP breast implants. Furthermore, we intend to raise awareness for the fact that the German GfE Medizintechnik and the Dutch manufacturer Rofil distributed the identical product with a different label. Supplementary, the medical and medico-legal aspects of the “PIP scandal” are discussed.

eingereicht 21.12.2011

revidiert 6.2.2012

akzeptiert 7.2.2012

### Bibliografie

**DOI** <http://dx.doi.org/10.1055/s-0031-1298323>  
Geburtsh Frauenheilk 2012; 72:  
1–4 © Georg Thieme Verlag KG  
Stuttgart · New York ·  
ISSN 0016-5751

### Korrespondenzadresse

**Dr. Florian M. Lampert**  
Universitätsklinikum Freiburg  
Abteilung Plastische und  
Handchirurgie  
Hugstetter Straße 55  
79106 Freiburg i. Br.  
florian.lampert@  
uniklinik-freiburg.de

### Einführung

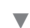

Bereits im Mai 2000 fand eine Inspektion der US-amerikanischen Food and Drug Administration (FDA) in der südfranzösischen Produktionsstätte des Implantatherstellers Poly Implant Prothèse (PIP) statt; als Folge der dort festgestellten Unregelmäßigkeiten verlor PIP die Zulassung für den US-Markt. Nachdem schon in den Jahren 2006 [1] und 2007 [2] erste Beschreibungen von Defekten an PIP-Brustimplantaten veröffentlicht worden waren, verfügte die französische Aufsichtsbehörde für Medizinprodukte (Afssaps) nach einer Häufung derartiger Vorfälle und deutlich erhöhten Ruptur- und Leckageraten dieser Produk-

te von 10 bzw. 11% [3] am 29. März 2010 die Aussetzung des Vertriebs und der Verwendung von PIP-Brustimplantaten. Ursächlich hierfür war die Verwendung von nicht zugelassenem und von den Herstellerunterlagen abweichendem Silikonmaterial. Ebenfalls betroffen sind die „M-Implants“ des niederländischen Herstellers Rofil sowie „TiBREEZE“-Brustimplantate der früheren GfE Medizintechnik GmbH. Eine erhöhte Mutagenität des Implantatmaterials wurde bisher nicht nachgewiesen, jedoch sind mittlerweile (Stand 28.12.2011) bei insgesamt 20 Trägerinnen von PIP-Implantaten Tumorerkrankungen aufgetreten. Nachdem in deutschsprachigen Ländern die Beachtung in Fachkreisen und öffentlichen Me-

dien zunächst gering war, brachte das Auftreten dieser Erkrankungen die Thematik ins öffentliche Bewusstsein.

Da Implantate der genannten Hersteller auch im deutschsprachigen Raum bei rekonstruktiven und ästhetischen Eingriffen zum Einsatz kamen, sollten die Vorkommnisse um diese Firmen und deren medizinisch-rechtlichen Konsequenzen für Klinik und Praxis bekannt sein.

### Behördliche Empfehlungen und Fazit für die Praxis

Von der Außerverkehrnahme von PIP-Implantaten bis zum vergangenen Jahreswechsel sahen die Empfehlungen der Afssaps (analog übernommen vom Bundesinstitut für Arzneimittel und Medizinprodukte, BfArM) für Trägerinnen von PIP-Implantaten sonografische (ggf. mammografische) Kontrolluntersuchungen der Implantate sowie der axillären Lymphknoten in 6-monatigen Abständen vor. Bei Verdacht auf Implantatruptur (auch einseitig) sollten beide Implantate zeitnah entfernt werden.

Die mittlerweile vorliegenden physikalisch-chemischen Analysen bestätigen die klinisch beobachtete, unzulässig hohe Rupturrate der verwendeten Implantathüllen sowie die Verwendung von hierfür nicht zugelassenem Industriesilikon als Implantatfüllung, welches eine lokale Entzündungsreaktion und axilläre Lymphangitis verursachen kann, aber auch kutane Manifestationen i. S. v. Silikonomen sind in der Literatur beschrieben [4].

Eine Zytotoxizität oder Mutagenität der Silikonfüllung wurde bisher nicht nachgewiesen [5], jedoch sind mittlerweile 20 Fälle von Tumorerkrankungen bei Trägerinnen von PIP-Brustimplantaten bekannt geworden, wie das französische Gesundheitsministerium am 28.12.2011 mitteilte [6]: In 16 Fällen handelte es sich um intramammäre Tumoren (15 Adenokarzinome und ein anaplastisches Lymphom), in 4 Fällen um Neubildungen außerhalb der Brust. Ein ursächlicher Zusammenhang zwischen den Brustimplantaten und den aufgetretenen Krebserkrankungen konnte im Rahmen der noch laufenden Untersuchungen bisher allerdings nicht nachgewiesen werden, die Inzidenz der Neubildungen bei PIP-Implantatträgerinnen bleibt unter derjenigen in der Gesamtbevölkerung.

Aufgrund der gehäuften Meldung von diffusem Ausschwitzen der Gelfüllung bei Implantaten auch ohne klinischen oder radiologischen Rupturverdacht (Gel-„Bleeding“) änderte die Afssaps am 23.12.2011 ihre Empfehlungen dahingehend, dass nun eine Entfernung der Implantate angeraten wird [7].

Das BfArM übernahm diese Empfehlung am 6.1.2012; sie gilt somit analog auch für Implantate der – mittlerweile ebenfalls insolventen – niederländischen Firma *Rofil Medical Nederland B.V.*, die baugleiche Implantate unter eigenem Namen anbot. Es handelt sich hier um die sog. *M-Implants* mit den Modellbezeichnungen *IMGHC-TX*, *IMGHC-MX* und *IMGHC-LS*, eine entsprechende Warnung der niederländischen Behörde *Inspectie voor de Gezondheidszorg* (IGZ) erging am 19.4.2010 [8]. Gleichfalls betroffen sind titanbeschichtete Implantate, welche unter Verwendung von PIP-Komponenten hergestellt und von der früheren GfE Medizintechnik GmbH von September 2003 bis August 2004 unter dem Namen „*TIBREEZE*“ in Verkehr gebracht wurden. Über die Anzahl der verwendeten Implantate liegen im Falle von PIP und Rofil keine gesicherten Zahlen vor, Schätzungen gehen von etwa 30 000 in Frankreich und bis zu 500 000 weltweit aus. Zur Situation in Deutschland hat das BfArM die obersten Landesgesundheitsbehörden gebeten, mitzuteilen, wie viele PIP-/Rofil-Implantate verwendet wurden, Ergebnisse liegen noch nicht vor (Stand

2.2.2012). Die Nachfolgefirma der GfE Medizintechnik GmbH, die pfm medical titanium GmbH gibt die Zahl der in Verkehr gebrachten *TIBREEZE*-Implantate mit 728 an.

Das BfArM empfiehlt, „dass die betroffenen Implantate als Vorsichtsmaßnahme entfernt werden sollten“, die behandelnden Ärzte sind aufgefordert, die betroffenen Patientinnen zu kontaktieren und auf das empfohlene Prozedere hinzuweisen. „Wie dringend eine Entnahme im Einzelfall ist, hängt wesentlich davon ab, wie lange die Patientin das Implantat bereits trägt. Dies sollte deshalb vor jeder Operation zwischen Arzt und Patientin besprochen werden“ [9]. Ebenfalls wird eindringlich auf die Meldeverpflichtung von Schadensfällen hingewiesen, da diese die Grundlage für weitere Maßnahmen zur Risikominimierung darstellen.

Die französischen Experten sprechen sich des Weiteren für die präoperative Anfertigung einer aktuellen Bildgebung der Mammæ (MRT oder Sonografie) und eine sonografische Untersuchung der Axillae aus. Im Rahmen der Explantation wird die im Ermessen des Chirurgen größtmögliche Entfernung der Implantatkapsel und deren systematische histologische Untersuchung angeraten, ein eventuell vorhandener periprotehetischer Erguss sollte ebenfalls zur zytologischen Untersuchung asserviert werden. Eine spezielle Nachsorge wird nach Explantation nicht gefordert.

Auf der Internetpräsenz des BfArM wird eine inoffizielle Übersetzung des den Afssaps-Empfehlungen zugrunde liegenden Sachverständigen-Gutachtens des französischen Nationalen Krebs-Instituts INCa angeboten [10].

Mit seiner Stellungnahme vom 1.2.2012 hat sich nun auf europäischer Ebene der wissenschaftliche Ausschuss „Neu auftretende und neu identifizierte Gesundheitsrisiken“ (SCENIHR) des Themas angenommen; die europäische Kommission hat daraufhin umfangreiche weitere Untersuchungen in Auftrag gegeben. Die Lehren aus diesem Fall werden auch in die anstehende Überarbeitung der europäischen Medizinprodukte-Richtlinie Eingang finden [11].

### Klinischer Fall

Auf den zu diesem Zeitpunkt wenig bekannten Zusammenhang zwischen PIP und Rofil wurden wir aufmerksam, als sich im Juli 2010 in unserer Abteilung eine 27-jährige Patientin vorstellte, bei welcher nach 3 Jahre zuvor auswärts aus ästhetischer Indikation vorgenommener Mammaaugmentation mit 350 ml Rofil-Implantaten bds. eine akute klinische und laborchemische Infektionskonstellation an der rechten Brust mit Fieber sowie lokaler Schwellung und axillärer Lymphadenitis bestand. Bei auch von der MR-Schnittbildgebung unterstütztem Verdacht auf Implantatruptur und periprotehetischer Infektion erfolgte die unverzügliche operative Revision, bei welcher sich aus dem Implantatlager dünnflüssiger Eiter entleerte (● Abb. 1), ein Erreger konnte nicht nachgewiesen werden. Neben einem diffusen Ausschwitzen der Gelfüllung („Bleeding“) zeigte sich zusätzlich ein deutlicher Riss an der dem Thorax zugewandten Seite des Implantats (● Abb. 2) sowie histologisch eine florid-eitrige, teils abszedierende Lymphadenitis mit Silikonachweis in den exzidierten Lymphknoten (● Abb. 3).

Nach unauffälligem weiteren Therapieverlauf konnte nach 6-monatiger Infektfreiheit die Entfernung des verbliebenen linksseitigen Implantats und eine beidseitige Re-Augmentation vorgenommen werden. Hierbei waren auch an dem klinisch asymp-

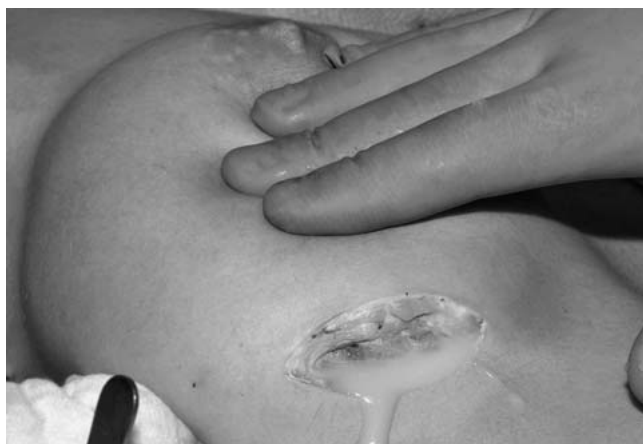

**Abb. 1** Intraoperativer Befund nach Eröffnung des Implantatlagers.

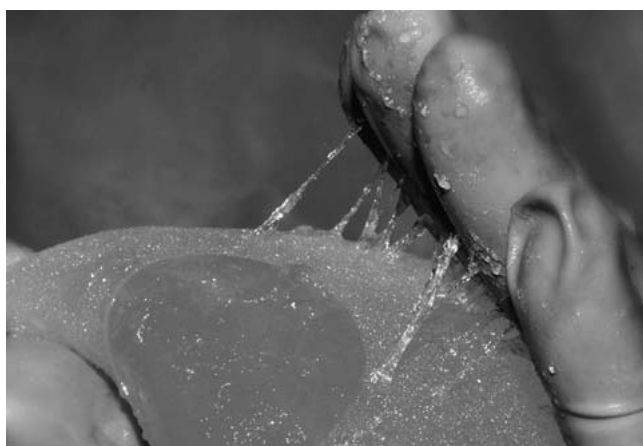

**Abb. 2** Defektes Implantat mit Gel-„Bleeding“ und sichtbarem Riss.

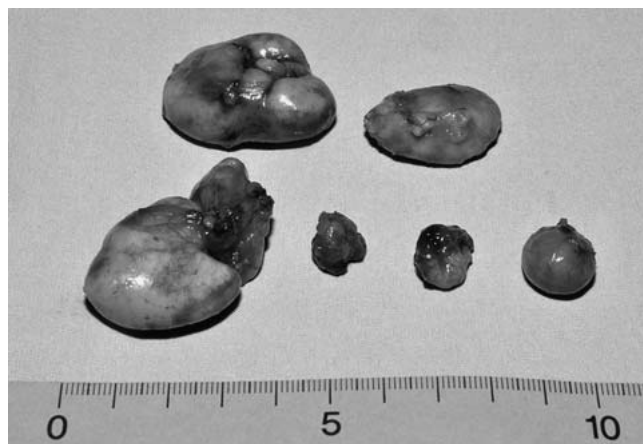

**Abb. 3** Makroskopische Ansicht der exziierten, entzündlich veränderten axillären Lymphknoten.

tomatisch gebliebenen Implantat Silikon-Ausschwitzungen und eine Perforation der Hülle festzustellen.

## Diskussion

Die vorliegende Darstellung soll dazu beitragen, dem Kollegenkreis für die mittlerweile als „PIP-Skandal“ bekannten Vorfälle um die Firma Poly Implant Prothèse anhand eines typischen Falles einen Überblick über die aktuelle Sachlage zu geben; auch die Rolle von Rofil und GfE sollte in diesem Zusammenhang bekannt sein, da dies sowohl Konsequenzen für die Therapieentscheidung hat, gleichzeitig jedoch auch juristisch bedeutsam ist: Bei minderwertigen Implantaten liegt hier schließlich ein Fall von Produkthaftung und keine fehlerhafte Handhabung des Implantats durch den Operateur vor. Da die Schadhafteit der Implantate für die Behandler nicht erkennbar war und die Produkte *bona fide* im Vertrauen auf die durch das CE-Siegel suggerierte Qualität zur Anwendung kamen, erscheint es äußerst unwahrscheinlich, dass auf die behandelnden Ärzte Regressforderungen zukommen; dessen ungeachtet ist der Schaden für die Reputation der betroffenen Praxen oder Institutionen immens. Auch der TÜV Rheinland als zertifizierendes Institut steht wegen dem Vorwurf unzureichender Kontrollen in der öffentlichen Kritik, sieht sich

allerdings selbst vorsätzlich vom Hersteller getäuscht und hat Strafanzeige gegen PIP gestellt, da im Rahmen der (angekündigten) Inspektionen vor Ort stets nur die korrekt zugelassenen Produkte und Dokumente präsentiert worden waren.

In welchem Umfang die Afssaps von der FDA über die bereits im Jahre 2000 festgestellten Unzulänglichkeiten bei PIP in Kenntnis gesetzt wurde, ist unklar.

Ein weiteres medikolegales Problem in diesem Zusammenhang ist die Tatsache, dass es sich bei einer rein ästhetischen Mammaaugmentation im Falle der Behandlung einer Komplikation um einen medizinisch erforderlichen Revisionseingriff nach vorausgegangener, medizinisch nicht indizierter Maßnahme handelt, dessen Kosten die Krankenkasse zwar trägt, welche die Patientin jedoch gemäß der mit Wirkung vom 1.4.2007 in Kraft getretenen Neufassung des § 52 Abs. 2 SGB V (Leistungsbeschränkung bei Selbstverschulden) „in angemessener Höhe“ zu beteiligen hat [12], was mit erheblichen Folgekosten für die Patientin verbunden sein kann. Teilweise haben die Kassen jedoch erklärt, ihren Ermessensspielraum im Rahmen von Einzelfallentscheidungen kulant zu handhaben, zumal hier ein Fremdverschulden Dritter ursächlich ist. Die privaten Krankenversicherer übernehmen – analog zur Regelung der gesetzlichen französischen Krankenkasse – auch bei aus ästhetischer Indikation eingebrachten Implantaten zumindest die Kosten für Diagnostik und Explantation in voller Höhe.

Der „PIP-Skandal“ wirft erneut die Frage auf, inwieweit die deutlich geringeren Anforderungen an Medizinprodukte im Vergleich zu Arzneimitteln im Zulassungsverfahren gerechtfertigt sind; auch nach Markteinführung könnte ein verbindliches Zentralregister dazu beitragen, Qualitätsmängel schneller erkennen und beheben zu können.

Aufgrund der Dynamik der Entwicklung in den vergangenen Monaten und der noch laufenden Untersuchungen sei den Betroffenen nochmals nahegelegt, den Fortgang der Dinge im Hinblick auf medizinische und juristische Konsequenzen für die Klinik weiter zu verfolgen.

## Interessenkonflikt

▼  
Nein.

## Literatur

- 1 Lahiri A, Waters R. Locoregional silicone spread after high cohesive gel silicone implant rupture. *J Plast Reconstr Aesthet Surg* 2006; 59: 885–886
- 2 Berry RB. Rupture of PIP breast implants. *J Plast Reconstr Aesthet Surg* 2007; 60: 967–968
- 3 [http://www.afssaps.fr/var/afssaps\\_site/storage/original/application/a2a42a100397ef195ce58b25356e9208.pdf](http://www.afssaps.fr/var/afssaps_site/storage/original/application/a2a42a100397ef195ce58b25356e9208.pdf); Stand: 2.2.2012
- 4 Cawrse NH, Pickford MA. Cutaneous manifestation of silicone dissemination from a PIP implant – a case for prophylactic explantation? *J Plast Reconstr Aesthet Surg* 2011; 64: e208–e209
- 5 [http://www.bfarm.de/cln\\_103/DE/Medizinprodukte/riskinfo/empfehlungen/Silikon\\_Brustimplantate\\_PIP\\_testergebnisse\\_de.html](http://www.bfarm.de/cln_103/DE/Medizinprodukte/riskinfo/empfehlungen/Silikon_Brustimplantate_PIP_testergebnisse_de.html); Stand: 2.2.2012
- 6 [http://www.afssaps.fr/var/afssaps\\_site/storage/original/application/415345629d5e9688691ee00bdc3a4ddf.pdf](http://www.afssaps.fr/var/afssaps_site/storage/original/application/415345629d5e9688691ee00bdc3a4ddf.pdf); Stand: 2.2.2012
- 7 [http://www.afssaps.fr/var/afssaps\\_site/storage/original/application/41d18730821fc09793fc9b848f6e090b.pdf](http://www.afssaps.fr/var/afssaps_site/storage/original/application/41d18730821fc09793fc9b848f6e090b.pdf); Stand: 2.2.2012
- 8 <http://www.igz.nl/actueel/nieuws/verbodopenwaarschuwingvoorborstimplantatenvanpolyimplantprothesespip.aspx>; Stand: 2.2.2012
- 9 [http://www.bfarm.de/DE/Medizinprodukte/riskinfo/empfehlungen/Silikon\\_Brustimplantate\\_PIP.html](http://www.bfarm.de/DE/Medizinprodukte/riskinfo/empfehlungen/Silikon_Brustimplantate_PIP.html); Stand: 2.2.2012
- 10 [http://www.bfarm.de/SharedDocs/1\\_Downloads/DE/Medizinprodukte/riskinfo/empf/PIP\\_dt-Uebersetzung.pdf?\\_\\_blob=publicationFile](http://www.bfarm.de/SharedDocs/1_Downloads/DE/Medizinprodukte/riskinfo/empf/PIP_dt-Uebersetzung.pdf?__blob=publicationFile); Stand: 2.2.2012
- 11 SCENIHR (Scientific Committee on Emerging and Newly Identified Health Risks). Safety of PIP silicone breast implant, 1 February 2012. [http://ec.europa.eu/health/scientific\\_committees/emerging/docs/scenihr\\_o\\_034.pdf](http://ec.europa.eu/health/scientific_committees/emerging/docs/scenihr_o_034.pdf); Stand: 6.2.2012
- 12 Wienke A. Eigenverantwortung der Patienten/Kunden Wohin führt der Rechtsgedanke des § 52 Abs. 2 SGB V? In: Wienke A, Eberbach W, Kramer H-J, Janke K, Hrsg. Die Verbesserung des Menschen – Tatsächliche und rechtliche Aspekte der wunscherfüllenden Medizin. MedR Schriftenreihe Medizinrecht. Berlin, Heidelberg: Springer Verlag; 2009: 169–177
